# Supplementary material
Source: PubMed Central journal article supplement (PMC2899914)
Supplement: pp.110.158147_1.pdf [file pp.110.158147_1.pdf]

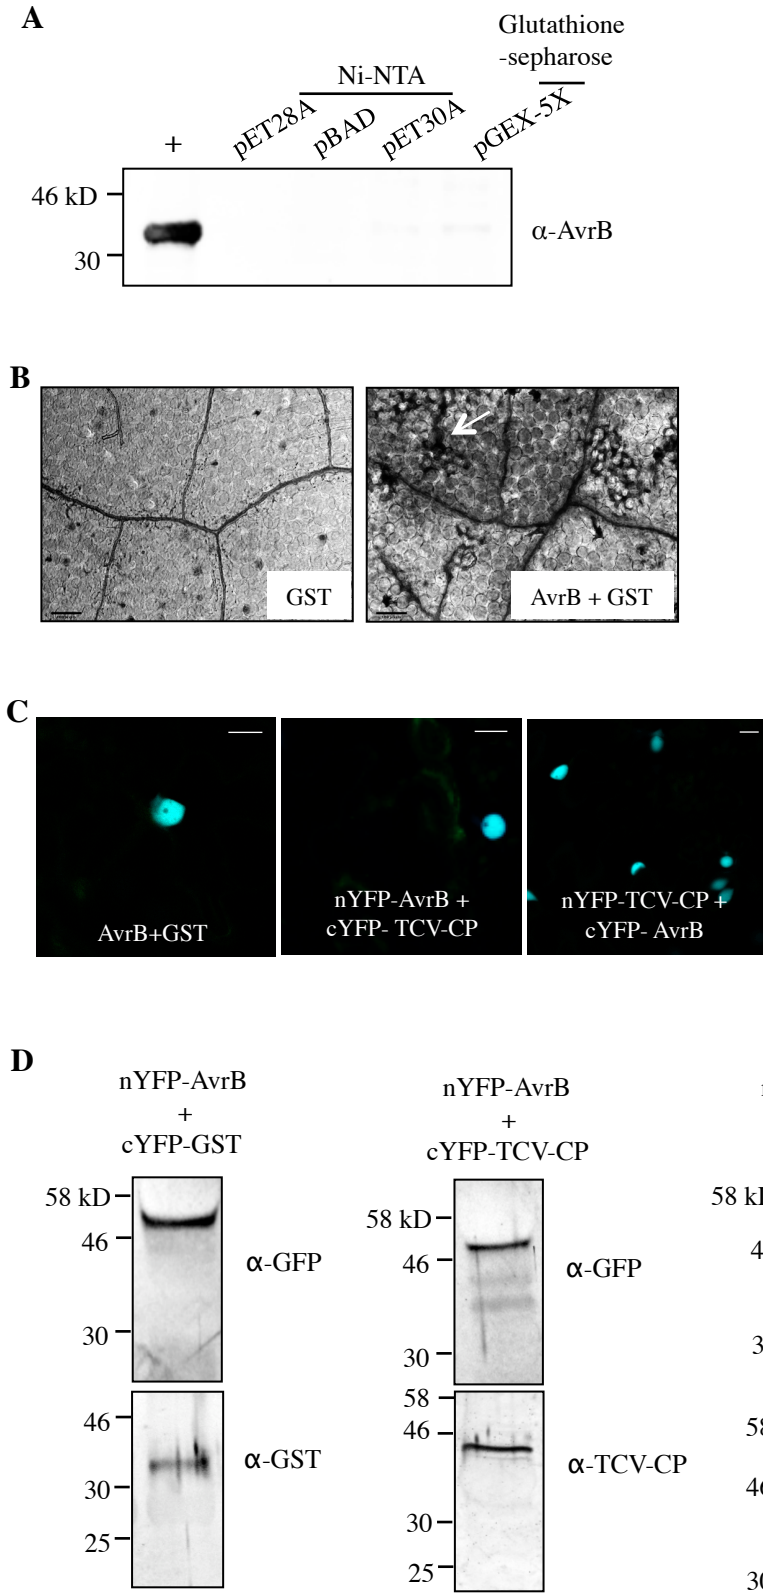

**Supplemental Figure 1. (A)** Western blot analysis of AvrB showing no non-specific retention on affinity resins bound to protein extracts from cells expressing empty vectors as indicated. 1  $\mu$ g of AvrB was incubated with Ni-NTA agarose preincubated with protein extracts from *E. coli* cells expressing the empty pET28A/pET30A/pBAD plasmids, or with glutathione-sepharose preincubated with extracts from pGEX-5X expressing cells. After extensive washing, bound AvrB was visualized by western blot analysis using  $\alpha$ -AvrB antibodies. 0.5  $\mu$ g of purified AvrB was loaded as positive control (+). **(B)** Microscopy of trypan blue stained leaves. Arrow indicates cell death in AvrB-infiltrated plants. Scale bars represent 270 microns. **(C)** CFP and YFP overlay images (40X magnification) of micrograph at 48 h post-infiltration from leaves co-expressing nYFP-AvrB and cYFP-GST or cYFP-TCV-CP, or nYFP-TCV-CP and cYFP-AvrB. Images are representative of three separate infiltrations from two independent experiments. Scale bars: 10  $\mu$ m. **(D)** Western blot analyses of proteins from *N. benthamiana* leaves co-expressing indicated proteins and probed with  $\alpha$ -GFP (to detect nYFP-AvrB),  $\alpha$ -AvrB (to detect cYFP-AvrB),  $\alpha$ -GST, or  $\alpha$ -TCV-CP antibodies.

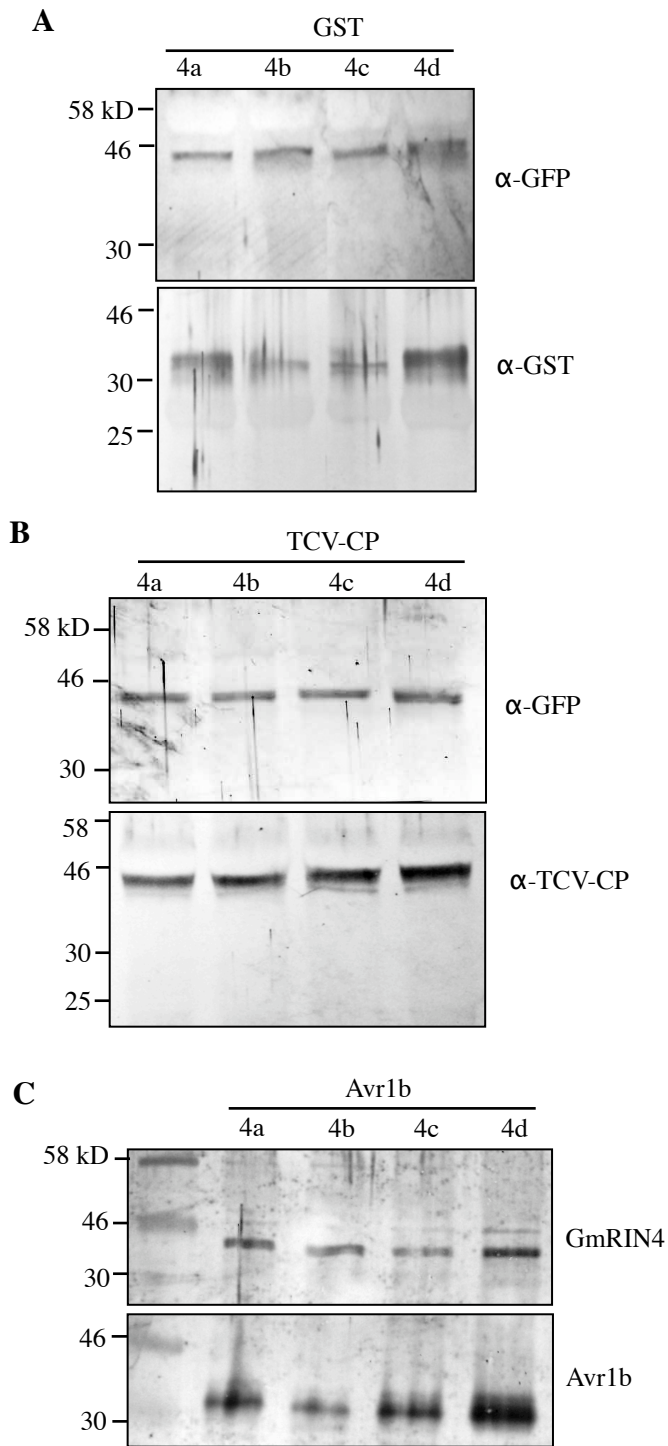

**Supplemental Figure 2.** Western blot analyses of proteins from *N. benthamiana* leaves co-expressing GmRIN4a-d (4a-4d) with GST (A), TCV-CP (B), or Avr1b (C). Proteins detected using  $\alpha$ -GFP (4a-4d in A & B and Avr1b in C),  $\alpha$ -GST, or  $\alpha$ -TCV-CP antibodies. For detecting GmRIN4 proteins in BiFC assays shown in Figure 2C, protein extracts from leaves co-expressing nEYFP-GmRIN4a, b, c, or d +cEYFP-Avr1b were used, whereas for Avr1b detection protein extracts from leaves co-expressing nEYFP-Avr1b+cEYFP-GmRIN4a, b, c, or d were used, since the  $\alpha$ -GFP antibodies only detect nEYFP.

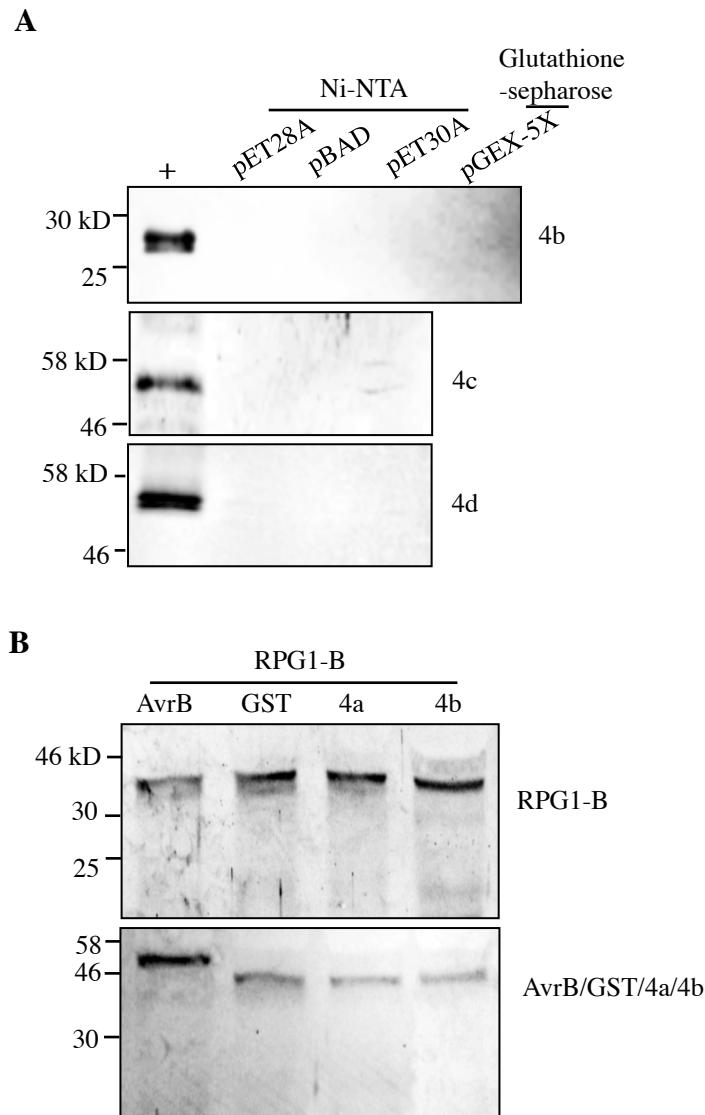

**Supplemental Figure 3.** (A) Western blot analysis of GmRIN4a, b or c (4a-4c) showing no non-specific retention of the respective proteins on affinity resins bound to protein extracts from cells expressing empty vectors as indicated. 1  $\mu$ g each of the GmRIN4 proteins (as indicated on the right) were incubated with Ni-NTA agarose preincubated with protein extracts from *E. coli* cells expressing the empty pET28A/pET30A/pBAD plasmids, or with glutathione-sepharose preincubated with cells expressing the empty pGEX-5X vector. After extensive washing, bound proteins were detected by western blot analysis using  $\alpha$ -Myc (4b) or  $\alpha$ -GST (4c/4d) antibodies. 500 ng of the respective purified GmRIN4 protein was loaded as positive control (+). (B) Western blot analysis of proteins from *N. benthamiana* plants co-expressing indicated proteins and probed with  $\alpha$ -GFP antibodies.  $\alpha$ -GFP antibodies only detect nEYFP. For detecting RPG1-B in BiFC assays shown in Figure 3C, protein extracts from leaves co-expressing nEYFP-RPG1-B+cEYFP-GmRIN4a/GmRIN4b/GST/AvrB were used (upper panel). Protein extracts from leaves co-expressing reciprocal infiltrations (cEYFP-RPG1-B+nEYFP-GmRIN4a/GmRIN4b/GST/AvrB) were used to detect GmRIN4a/GmRIN4b/GST/AvrB (lower panel).

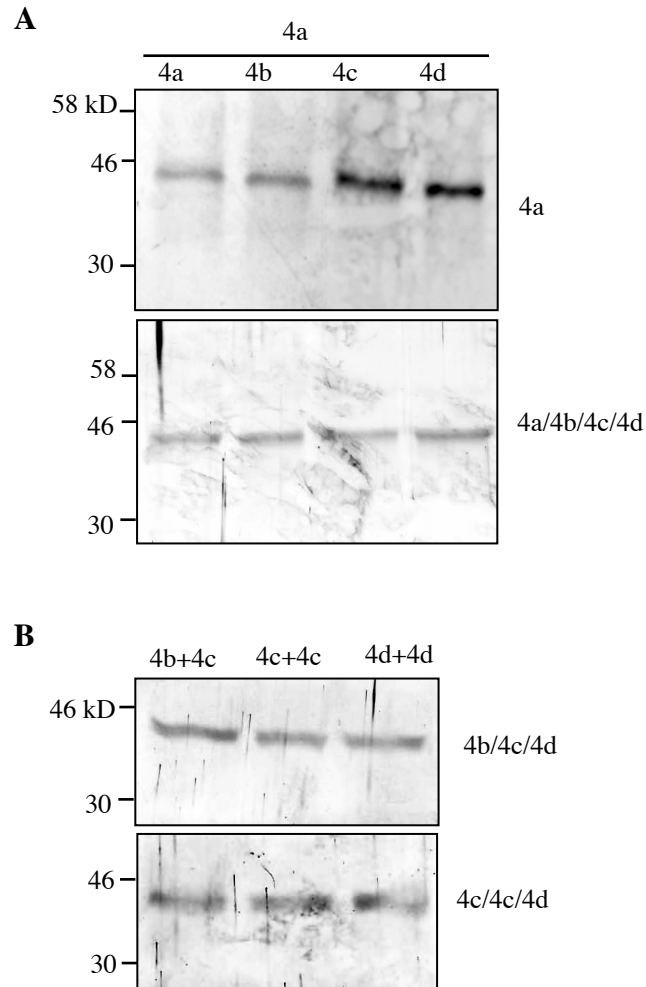

**Supplemental Figure 4.** Western blot analysis of proteins from *N. benthamiana* plants co-expressing indicated proteins and probed with  $\alpha$ -GFP antibodies.  $\alpha$ -GFP antibodies only detect nEYFP. **(A)** For detecting GmRIN4a in BiFC assays shown in Figure 6C, protein extracts from leaves co-expressing nEYFP-GmRIN4a+cEYFP-GmRIN4a/GmRIN4b/GmRIN4c/GmRIN4d were used (upper panel). Protein extracts from leaves co-expressing reciprocal infiltrations (cEYFP-GmRIN4a+nEYFP-GmRIN4a/GmRIN4b/GmRIN4c/GmRIN4d) were used to detect GmRIN4a/GmRIN4b/GmRIN4c/GmRIN4d (lower panel). **(B)** GmRIN4b in the GmRIN4b+GmRIN4c BiFC assay was detected in extracts from leaves co-expressing nEYFP-GmRIN4b+cEYFP-GmRIN4c (upper panel), whereas GmRIN4c as detected from leaves co-expressing nEYFP-GmRIN4c+cEYFP-GmRIN4b (lower panel). GmRIN4c or GmRIN4d in the GmRIN4c+GmRIN4c or GmRIN4d+GmRIN4d BiFC assays were detected in extracts from leaves co-expressing nEYFP-GmRIN4c+cEYFP-GmRIN4c or nEYFP-GmRIN4d+cEYFP-GmRIN4d, respectively (upper and lower panels).
